# Supplementary material for: A Magnesium Carbonate Hydroxide Nanofiber/Poly(Vinylidene Fluoride) Composite Membrane for High-Rate and High-Safety Lithium-Ion Batteries
Source: MDPI journal article supplement (doi:10.3390/polym15204120), 2023-10-17
Supplement: s1 [file s1]

## Supporting information

### Supplementary Materials

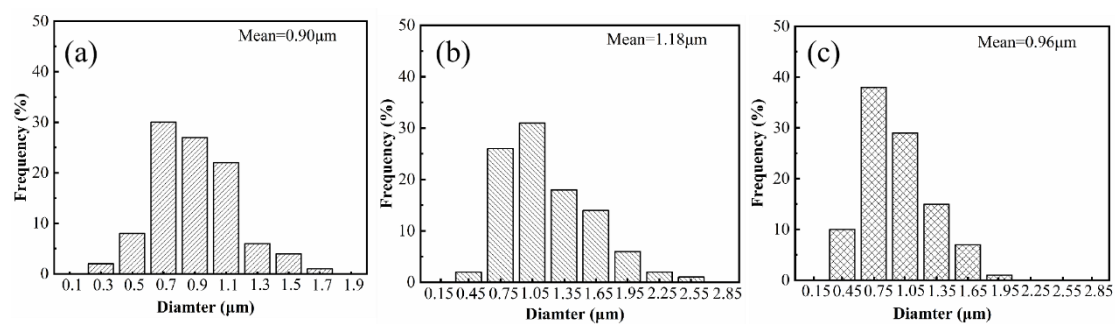

Figure S1. Pore size distributions of (a) PM-10, (b) PM-30, and (c) PM-50 membranes.

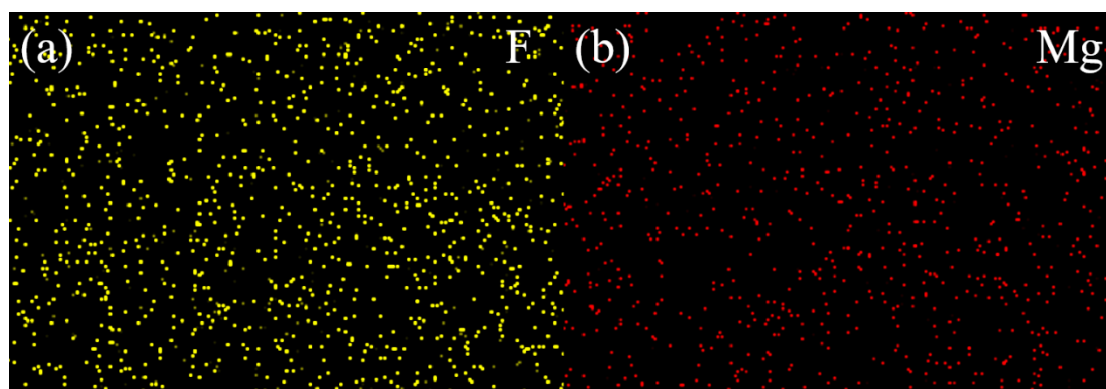

Figure S2. EDS mapping of PM-50 membranes with F and Mg elements.

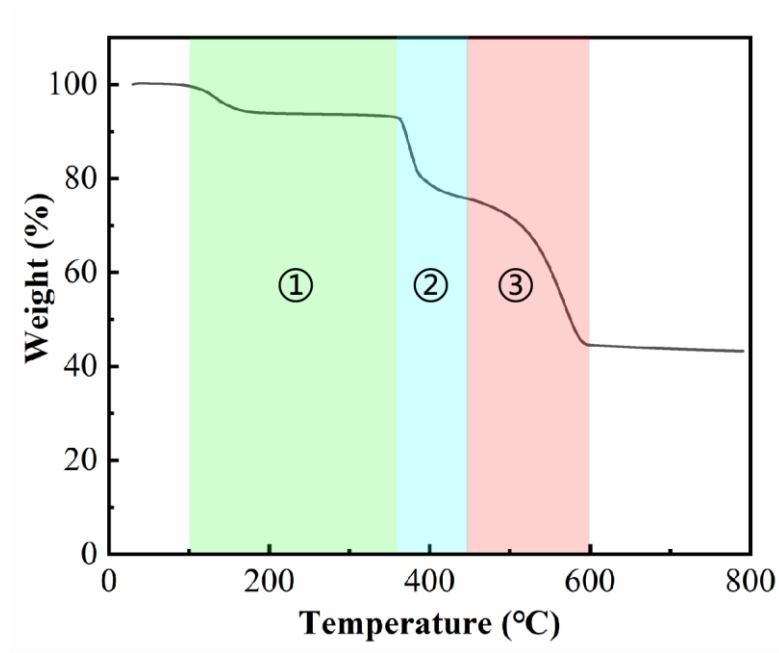

Figure S3. TG curve of MCH nanofibers.

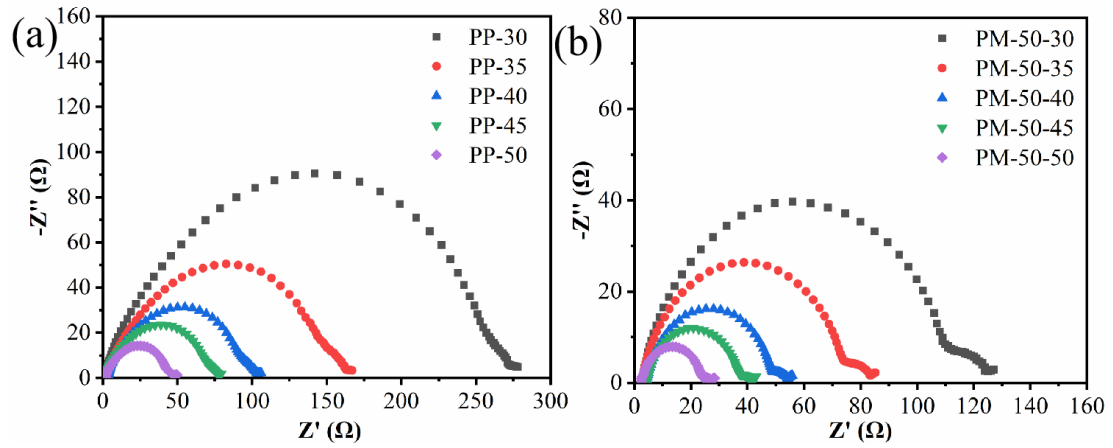

Figure S4. The charge transfer resistances ( $R_{ct}$ ) at different temperatures of symmetric Li/Li cells with (a) PP and (b) PM-50 membranes.

Table S1. The specific values for lithium ion transference number calculation

| cell        | $I_0$ ( $\mu\text{A}$ ) | $I_s$ ( $\mu\text{A}$ ) | $R_0$ ( $\Omega$ ) | $R_s$ ( $\Omega$ ) | $\Delta V$ (V) | $t_{\text{Li}^+}$ |
|-------------|-------------------------|-------------------------|--------------------|--------------------|----------------|-------------------|
| Li/PP/Li    | 70.7                    | 66.4                    | 255.6              | 328.7              | 0.01           | 0.64              |
| Li/PM-50/Li | 94.2                    | 84.5                    | 229.9              | 270.5              | 0.01           | 0.81              |
